# Supplementary material
Source: publisher figshare collection journal article supplement (https://gsajournals.figshare.com/ndownloader/files/23746673)
Supplement: Supplementary file 1 [file 23746673]

## Sheet: Table S1
Table S1. Information of 629 rapeseed accessions used to detect the substitution site in BnaA03.YVL.
Code	Accession name		AllelicSNP	Origin	Ecotype
1	Yangguang198		C:C	China	SW
2	Zhen2808		C:C	China	SW
3	1033019		C:C	China	SW
4	699		C:C	China	SW
5	Zhongshuang11-1		C:C	China	SW
6	Huahang901		C:C	China	SW
7	FC03		C:C	China	SW
8	Zhongshuang11		C:C	China	SW
9	72118		C:C	China	SW
10	YangJ6711		C:C	China	SW
11	Zheyou28		C:C	China	SW
12	Yangguang2009		C:C	China	SW
13	Huyou21		C:C	China	SW
14	Yanyou2		C:C	China	SW
15	Hongyou3		C:C	China	SW
16	Yangjian8		C:C	China	SW
17	P6036-1		C:C	China	SW
18	Xiwang106		C:C	China	SW
19	Zheyou18		C:C	China	SW
20	P4009		C:C	China	SW
21	68232		C:C	China	SW
22	N5424		C:C	China	SW
23	P6036-2		C:C	China	SW
24	Zhongshuang1		C:C	China	SW
25	Huyou17		C:C	China	SW
26	Zhongshuang9-1		C:C	China	SW
27	Zheyou601		C:C	China	SW
28	N6013		C:C	China	SW
29	Zheyou5002		C:C	China	SW
30	40853		C:C	China	SW
31	282081		C:C	China	SW
32	Zhongnongyou136		C:C	China	SW
33	Zheyou17		C:C	China	SW
34	24729		C:C	China	SW
35	Shengguang77		C:C	China	SW
36	Zheyou19		C:C	China	SW
37	Zhongshuang4		C:C	China	SW
38	Zhongshuang5		C:C	China	SW
39	Zhongshuang6		C:C	China	SW
40	Zhongshuang7		C:C	China	SW
41	Zhongshuang8		C:C	China	SW
42	Zhongshuang9-2		C:C	China	SW
43	Zhongshuang10		C:C	China	SW
44	Huyou19		C:C	China	SW
45	Huashuang4		C:C	China	SW
46	Huashuang5		C:C	China	SW
47	Fuyou668		C:C	China	SW
48	You88		C:C	China	SW
49	Nannongyou1		C:C	China	SW
50	Nannongyou2		C:C	China	SW
51	Nannongyou3		C:C	China	SW
52	Legacy-1		C:C	Sweden	SW
53	Huaiyou18		C:C	China	SW
54	Ningyou18		C:C	China	SW
55	91806-9		C:C	China	SW
56	9630		C:C	China	SW
57	96E01×6529-2		C:C	China	SW
58	Zhongshuang4-2		C:C	China	SW
59	J2351		C:C	China	SW
60	Riyou3②×Hu840049		C:C	China	SW
61	20043		C:C	China	SW
62	21933		C:C	China	SW
63	30852		C:C	China	SW
64	9548×9630		C:C	China	SW
65	91806×889		C:C	China	SW
66	8976-10-01		C:C	China	SW
67	04BD650		C:C	China	SW
68	082×888-3		C:C	China	SW
69	888-5		C:C	Sweden	S
70	D083×888-5		C:C	China	SW
71	J113		C:C	China	SW
72	228-1×YD12		C:C	China	SW
73	2020-02-29		C:C	China	SW
74	888		C:C	China	SW
75	695		C:C	China	SW
76	855		C:C	China	SW
77	888 458		C:C	China	SW
78	897 274 QH412		C:C	China	SW
79	G142		C:C	China	SW
80	Zhongshuang9-3		C:C	China	SW
81	BF148		C:C	China	SW
82	7186 TYT2		C:C	China	SW
83	08F××		C:C	China	SW
84	782-2		C:C	China	SW
85	D083		C:C	Germany	W
86	M083		C:C	Germany	W
87	Chuanyou96II-19		C:C	China	SW
88	Zhongkao9		C:C	China	SW
89	94005		C:C	China	SW
90	ChuanyouIII-20		C:C	China	SW
91	Gumengkuyoucai(1)		C:C	China	SW
92	84Fen-7		C:C	China	SW
93	96CY007		C:C	China	SW
94	Shengliqinggeng		C:C	China	SW
95	Aiqishengli		C:C	China	SW
96	Hunongzao		C:C	China	SW
97	Huyou4		C:C	China	SW
98	Junnong1		C:C	China	SW
99	Duoyou1		C:C	China	SW
100	Dahuaqiu		C:C	China	SW
101	Shanyou110		C:C	China	SW
102	424		C:C	China	SW
103	Huayou1		C:C	China	SW
104	Xiangyou2		C:C	China	SW
105	71-39		C:C	China	SW
106	Ciyou1		C:C	China	SW
107	Xiuyou1		C:C	China	SW
108	Chuannongchangjiao		C:C	China	SW
109	Chuangyouhuaye		C:C	China	SW
110	Aijiazao		C:C	China	SW
111	Xian302		C:C	China	SW
112	Huzhou2		C:C	China	SW
113	Yiyou5		C:C	China	SW
114	Yunyou3		C:C	China	SW
115	Yunyou31		C:C	China	SW
116	Qingyou4		C:C	China	S
117	Hujizao		C:C	China	SW
118	Luojingxuanxi		C:C	China	SW
119	Zheyou7		C:C	China	SW
120	82773		C:C	China	SW
121	Ninyou7		C:C	China	SW
122	Fengding240		C:C	China	SW
123	Yang2008		C:C	China	SW
124	Yangyou1		C:C	China	SW
125	Fengyou1		C:C	China	SW
126	BF10		C:C	China	SW
127	Guangde138		C:C	China	SW
128	790215		C:C	China	SW
129	3209		C:C	China	SW
130	410		C:C	China	SW
131	202-23		C:C	China	SW
132	Dangyouzao1		C:C	China	SW
133	Tonglinghuaye		C:C	China	SW
134	Huaye1		C:C	China	SW
135	Qinyou3		C:C	China	SW
136	SE8-2		C:C	China	SW
137	Xinyang7833		C:C	China	SW
138	Ganyou5		C:C	China	SW
139	Zaoshuxiangyou5		C:C	China	SW
140	Yixuan159		C:C	China	SW
141	318-6 (1)		C:C	China	SW
142	Yuyiganlan		C:C	China	SW
143	78007		C:C	China	SW
144	6013-03-01		C:C	China	SW
145	6020-01-01		C:C	China	SW
146	6019-03-01		C:C	China	SW
147	0011-1		C:C	China	SW
148	3-99		C:C	China	SW
149	1118-2		C:C	China	SW
150	4850-4949		C:C	China	SW
151	1984-03-01		C:C	China	SW
152	85-13		C:C	China	SW
153	EH3145		C:C	China	SW
154	EH3143		C:C	China	SW
155	23002		C:C	China	SW
156	2W019		C:C	China	SW
157	3W017		C:C	China	SW
158	Zaofeng50		C:C	China	SW
159	Xiangyou10		C:C	China	SW
160	Xuyou2		C:C	China	SW
161	Huaiyou251		C:C	China	SW
162	Chen'erzi		C:C	China	SW
163	Lianyuan77-8		C:C	China	SW
164	Yueyang8565		C:C	China	SW
165	78015		C:C	China	SW
166	78036		C:C	China	SW
167	81074		C:C	China	SW
168	TB313		C:C	China	SW
169	Xiangnongyou3		C:C	China	SW
170	1975-01-01		C:C	China	SW
171	Boyou1		C:C	China	SW
172	83006		C:C	China	SW
173	730004		C:C	China	SW
174	21006		C:C	China	SW
175	Chongyou202		C:C	China	SW
176	57-43		C:C	China	SW
177	Yunyou9		C:C	China	SW
178	76-004		C:C	China	SW
179	Zaoshushengli		C:C	China	SW
180	Hongqiaoyou1		C:C	China	SW
181	Fuyou2		C:C	China	SW
182	Dandi1		C:C	China	SW
183	Fuyou3		C:C	China	SW
184	97Xuan		C:C	China	SW
185	EYou97007youcai		C:C	China	SW
186	E097037		C:C	China	SW
187	Longyoutuzhong		C:C	China	SW
188	GSB616		C:C	China	SW
189	GSB641		C:C	China	SW
190	97998		C:C	China	SW
191	971014		C:C	China	SW
192	971038		C:C	China	SW
193	Huangzi6		C:C	China	SW
194	99-48		C:C	China	SW
195	Chuangyou96II45		C:C	China	SW
196	01NM.305		C:C	Australia	S
197	01NQ.142		C:C	Australia	S
198	GLOBAL		C:C	Australia	S
199	Rainbow		C:C	Canada	S
200	Ranger		C:C	Unknown	W
201	Surpass 400		C:C	Australia	S
202	Oscar		C:C	Australia	S
203	RR002		C:C	Australia	S
204	HJa98942		C:C	Finland	S
205	Dong-Hae23		C:C	Japan	SW
206	Kojo35		C:C	Japan	SW
207	943		C:C	Pakistan	SW
208	GoLda		C:C	Canada	S
209	RV3		C:C	Australia	S
210	BLN247		C:C	Australia	S
211	Wesway		C:C	Australia	S
212	Wesbrook		C:C	Australia	S
213	green cabbage		C:C	Sierra leone	S
214	Ujfertadi		C:C	Hungary	W
215	NPZ 3/84		C:C	Germany	W
216	NPZ 51		C:C	Germany	W
217	Leras		C:C	Germany	S
218	H47		C:C	Russia	W
219	Gorczanski		C:C	Poland	W
220	Tripol		C:C	Poland	W
221	P6		C:C	Poland	W
222	77-258		C:C	UnitedKingdom	S
223	Helanheiyoucai		C:C	Poland	W
224	H56		C:C	United	W
				Kingdom
225	Mochowski		C:C	France	W
226	Mochowski		C:C	France	W
227	Nabo		C:C	France	S
228	Drake		C:C	France	W
229	Lingot		C:C	France	W
230	H33		C:C	France	W
231	Prota		C:C	France	S
232	P11		C:C	CzechRep	W
233	SV.Niklas		C:C	Sweden	S
234	SV.Gulle		C:C	Sweden	S
235	SV.Topas		C:C	Sweden	S
236	SV.Tyko		C:C	Sweden	W
237	Haplona		C:C	Sweden	S
238	P26		C:C	Sweden	S
239	Das chosen		C:C	America	S
240	79-186		C:C	America	S
241	Crimsonking		C:C	New Zealand	S
242	DoonSportan lot 616		C:C	New Zealand	S
243	Gudei lot		C:C	New Zealand	S
244	Puma-SV.8627102		C:C	Sweden	W
245	Fquom		C:C	Unknown	W
246	Nonglin32		C:C	Japan	SW
247	7304		C:C	India	W
248	31208		C:C	India	SW
249	34397		C:C	India	SW
250	MARNOO-2		C:C	Canada	S
251	Buk wuku		C:C	Korea	SW
252	HN9364		C:C	Korea	S
253	CRESOR		C:C	France	S
254	ESTTS		C:C	Sweden	S
255	Bounty		C:C	Sweden	S
256	Jackpot		C:C	Sweden	S
257	Trojan		C:C	Sweden	S
258	Vanguard		C:C	Sweden	S
259	Ceres		C:C	Sweden	W
260	delta		C:C	Sweden	S
261	ReainaII		C:C	Unknown	W
262	Legacy		C:C	Sweden	S
263	IUPITER		C:C	Unknown	W
264	Nonglin32		C:C	Japan	SW
265	Nonglin13		C:C	Japan	SW
266	Nonglin41		C:C	Japan	SW
267	584 HQ4438		C:C	China	SW
268	669 3C779		C:C	China	SW
269	1055		C:C	China	SW
270	889 QH456		C:C	China	SW
271	Zhongyou821-1		C:C	China	SW
272	897 274 QH412		C:C	China	SW
273	08A443		C:C	China	SW
274	944		C:C	China	SW
275	225		C:C	China	SW
276	EMS-1		C:C	China	SW
277	EMS-2		C:C	China	SW
278	EMS-6		C:C	China	SW
279	EMS-9		C:C	China	SW
280	EMS-10		C:C	China	SW
281	EMS-11		C:C	China	SW
282	EMS-15		C:C	China	SW
283	EMS-16		C:C	China	SW
284	EMS-20		C:C	China	SW
285	EMS-21		C:C	China	SW
286	EMS-25		C:C	China	SW
287	EMS-28		C:C	China	SW
288	EMS-30		C:C	China	SW
289	EMS-33		C:C	China	SW
290	EMS-34		C:C	China	SW
291	EMS-37		C:C	China	SW
292	EMS-41		C:C	China	SW
293	EMS-42		C:C	China	SW
294	EMS-43		C:C	China	SW
295	EMS-44		C:C	China	SW
296	EMS-46		C:C	China	SW
297	EMS-47(yvl)		T:T	China	SW
298	EMS-49		C:C	China	SW
299	EMS-51		C:C	China	SW
300	EMS-52		C:C	China	SW
301	EMS-53		C:C	China	SW
302	EMS-54		C:C	China	SW
303	EMS-61		C:C	China	SW
304	EMS-62		C:C	China	SW
305	EMS-68		C:C	China	SW
306	EMS-70		C:C	China	SW
307	EMS-72		C:C	China	SW
308	EMS-74		C:C	China	SW
309	EMS-75		C:C	China	SW
310	EMS-76		C:C	China	SW
311	EMS-78		C:C	China	SW
312	EMS-80		C:C	China	SW
313	EMS-81		C:C	China	SW
314	EMS-83		C:C	China	SW
315	EMS-84		C:C	China	SW
316	EMS-86		C:C	China	SW
317	EMS-89		C:C	China	SW
318	EMS-90		C:C	China	SW
319	EMS-91		C:C	China	SW
320	EMS-92		C:C	China	SW
321	EMS-93		C:C	China	SW
322	Xiangyou15		C:C	China	SW
323	Shengli52		C:C	China	SW
324	Chuanyou96II-57		C:C	China	SW
325	MOANA RAPE		C:C	New Zealand	W
326	Escort		C:C	France	W
327	Jantar		C:C	Poland	W
328	Licapo		C:C	Germany	W
329	Binera		C:C	Norway	W
330	Express 617		C:C	Germany	W
331	Rivette		C:C	Australia	S
332	Clipper		C:C	Germany	S
333	FORA		C:C	Sweden	W
334	Bolko		C:C	Poland	W
335	Mohican		C:C	UnitedKingdom	W
336	Picasso		C:C	UnitedKingdom	W
337	Verona		C:C	unknown	W
338	Atlantic		C:C	France	W
339	BRAUNER SCHNITTKOHL		C:C	Siberian	W
340	Zenith		C:C	unknown	W
341	Bladkool		C:C	Netherlands	W
342	Sobotkowski		C:C	Poland	W
343	Nosovskij 9		C:C	Russia	S
344	Uranus		C:C	Germany	S
345	Tower		C:C	Canada	S
346	TARGET		C:C	Canada	S
347	Tanka		C:C	Canada	S
348	MONTY-028DH		C:C	Australia	S
349	INDUSTRY		C:C	Denmark	S
350	Mozart		C:C	Denmark	S
351	Tribune		C:C	Australia	S
352	Vega		C:C	Denmark	S
353	Triton		C:C	Canada	S
354	Liho		C:C	Germany	S
355	Rucabo		C:C	Germany	S
356	Sophia		C:C	unknown	S
357	ACS YN95-C9392		C:C	Canada	S
358	Bronowski		C:C	Poland	S
359	Tribute		C:C	Canada	S
360	Huyou19-1		C:C	China	SW
361	Purler		C:C	Australia	S
362	Oro		C:C	Canada	S
363	YN171		C:C	China	SW
364	Zhongyou821-2		C:C	China	SW
365	Zhongyou821-3		C:C	China	SW
366	Zhongyou821-4		C:C	China	SW
367	HTP-001		C:C	Unknown	SW
368	GRC1156		C:C	China	SW
369	GRC1157		C:C	China	SW
370	ZF01		C:C	China	SW
371	XR1-134803		C:C	China	SW
372	ZHY18C-134818		C:C	China	SW
373	XR-134821		C:C	China	SW
374	XR-134825		C:C	China	SW
375	XR-134828		C:C	China	SW
376	XR-134831		C:C	China	SW
377	XR-134832		C:C	China	SW
378	XR-134836		C:C	China	SW
379	XR-134842		C:C	China	SW
380	XR-134812		C:C	China	SW
381	XR-134813		C:C	China	SW
382	ZHY18*XR-134851		C:C	China	SW
383	ZHY18*XR-134853		C:C	China	SW
384	XR*ZY119-134854		C:C	China	SW
385	XR*ZY119-134855		C:C	China	SW
386	ZY119*LB28134862		C:C	China	SW
387	LB28*ZY119134863		C:C	China	SW
388	LB28*XR-134869		C:C	China	SW
389	23D9ZHY18134878		C:C	China	SW
390	1AB-134691		C:C	China	SW
391	2AB-134701		C:C	China	SW
392	3AB-134704		C:C	China	SW
393	4AB-134707		C:C	China	SW
394	5AB-134710		C:C	China	SW
395	3361A*2B-134725		C:C	China	SW
396	H166B-134734		C:C	China	SW
397	3984B-134728		C:C	China	SW
398	28Z821*5B134739		C:C	China	SW
399	LB28A*6B134742		C:C	China	SW
400	3A*5B-134743		C:C	China	SW
401	227Qin2-134747		C:C	China	SW
402	4646*1528-134750		C:C	China	SW
403	5862*1536-134752		C:C	China	SW
404	LB*Q24862-134753		C:C	China	SW
405	2781B-134755		C:C	China	SW
406	19*16*408-134758		C:C	China	SW
407	29*8*32Q2134760		C:C	China	SW
408	ZYy11B-134761		C:C	China	SW
409	7B-134764		C:C	China	SW
410	237B-134771		C:C	China	SW
411	Z56602B-134773		C:C	China	SW
412	Z3B-134778		C:C	China	SW
413	ZHSH8B-134780		C:C	China	SW
414	5862ZHS4B-134785		C:C	China	SW
415	9803AB(237AB)-134786		C:C	China	SW
416	9805AB(21931)-134789		C:C	China	SW
417	9807AB(237AB)-134790		C:C	China	SW
418	9810AB(27821A(YY11B)(2716A*821-77B))-134791		C:C	China	SW
419	OguRf-134882		C:C	China	SW
420	92261B-13S01		C:C	China	SW
421	92278B-13S02		C:C	China	SW
422	Chuanyou-2H		C:C	China	SW
423	92285B-13S05		C:C	China	SW
424	92288B-13S06		C:C	China	SW
425	Zheyou-21-13S26		C:C	China	SW
426	Ningyou-8-13S27		C:C	China	S
427	QY-12-13S28		C:C	China	SW
428	92284B-13S30		C:C	China	SW
429	Xiangzayou No 1		C:C	China	SW
430	Yunyou-6H		C:C	China	SW
431	Defol		C:C	Canada	SW
432	Xiangzayou no 1B*ZY821		C:C	China	SW
433	Ganyou-5H		C:C	China	SW
434	Tongyou-1H		C:C	China	SW
435	Guinong78		C:C	China	SW
436	Regent		C:C	Canada	S
437	Aiyoucai		C:C	China	SW
438	ChnongCJ		C:C	China	W
439	Zhongyou821-5		C:C	China	SW
440	Tower*955		C:C	Canada	SW
441	RRI123		C:C	China	SW
442	Huahuang-1H		C:C	China	SW
443	Yuyou-2H		C:C	China	SW
444	Rucabo		C:C	Germany	S
445	Zhongshuang-2H		C:C	China	SW
446	Kunto		C:C	Unknown	SW
447	Bronowski		C:C	Poland	S
448	Ww1307-1		C:C	China	SW
449	Shanyou-110Y		C:C	China	SW
450	RRI116(7901)		C:C	China	SW
451	Jade		C:C	Germany
452	W-13		C:C	China	SW
453	Yunyou31*3-72		C:C	China	SW
454	Jianbo		C:C	China	SW
455	Ningyou-1H		C:C	China	SW
456	RRI036(86-1)		C:C	China	SW
457	Mardarn		C:C	Unknown
458	1356A		C:C	China	SW
459	RRI076(50-2)		C:C	China	SW
460	Xiuyou-2H		C:C	China	SW
461	Qingyou No 1		C:C	China	SW
462	Huayou-8H		C:C	China	SW
463	Huayou-3H		C:C	China	SW
464	RRI042		C:C	China	SW
465	294system		C:C	China	SW
466	Zhongyou-119		C:C	China	SW
467	936Y		C:C	China	SW
468	(8507*721)		C:C	China	SW
469	Tower*955*1002		C:C	China	SW
470	YE-4		C:C	Germany	SW
471	CJZHSH-2H		C:C	China	SW
472	Zhenong-605		C:C	China	SW
473	Wwkristina		C:C	Unknown	SW
474	87-216*816		C:C	China	SW
475	878*86340		C:C	China	SW
476	RRI179(2151)		C:C	China	SW
477	Brisld		C:C	Unknown	SW
478	Xpress		C:C	Germany	W
479	Nilla-46		C:C	Sweden	SW
480	Shan2A*1356B		C:C	China	SW
481	Chuyou-1H		C:C	China	SW
482	Weswag		C:C	Unknown	SW
483	DSV-SR-10-2		C:C	Germany	SW
484	Samorai		C:C	France	SW
485	4315*HAU-GRA012		C:C	China	SW
486	11807-90		C:C	Czech	W
487	YY50xuan-GRA053		C:C	China	SW
488	No petals		C:C	China	SW
489	ZhSH11X-GRA055		C:C	China	SW
490	C19*(CO2*2812)		C:C	China	SW
491	Q2*10*17R-GRA089		C:C	China	SW
492	Wanyou-12		C:C	China	SW
493	HOac(NG10-215)		C:C	China	SW
494	Huyou-21		C:C	China	SW
495	Jingyou-2H		C:C	China	SW
496	Zangyou-6H		C:C	China	SW
497	White-flower		C:C	China	SW
498	Baoyouzao12R		C:C	China	SW
499	Deyou-5HR		C:C	China	SW
500	Zheping-4H		C:C	China	SW
501	MiZhi-GRB074		C:C	China	SW
502	RRI193		C:C	China	SW
503	Qianyou-23H		C:C	China	SW
504	Fei-7		C:C	Ethiopia
505	Gaoyouyoucai		C:C	China	SW
506	Chuyou-4H		C:C	China	SW
507	Zhongyou-119		C:C	China	SW
508	Suyou211		C:C	China	SW
509	Zheshuang72		C:C	China	SW
510	Zheyou-19H		C:C	China	SW
511	Xiangyou-15H		C:C	China	SW
512	Gaoyou605		C:C	China	SW
513	Suyou-1H		C:C	China	SW
514	Zhengyou-5H		C:C	China	SW
515	Mianyouwang		C:C	China	SW
516	Gaoyouwang-99		C:C	China	SW
517	Shilijia		C:C	China	SW
518	GRA010		C:C	China	SW
519	07RGRA025-35		C:C	China	SW
520	07RGRA031		C:C	China	SW
521	Zheyou-50		C:C	China	SW
522	ZhongYza-11XBZ		C:C	China	SW
523	GRA059-GRB103		C:C	China	SW
524	11804-GRB104		C:C	Czech	W
525	11806-GRB105		C:C	Germany	W
526	Huyou-18		C:C	China	SW
527	XR2		C:C	China	SW
528	57R		C:C	China	SW
529	D02RC1		C:C	China	SW
530	X636		C:C	China	SW
531	XR3		C:C	China	SW
532	50Q21017*Q4HAU		C:C	China	SW
533	LB*(Qin2*4862)		C:C	China	SW
534	(4646*Q2)AH166B		C:C	China	SW
535	(Jie*15*27)5B		C:C	China	SW
536	3361*6B		C:C	China	SW
537	3361*50B		C:C	China	SW
538	50A*H166B		C:C	China	SW
539	D02RC-GRB780		C:C	China	SW
540	Huyou-18-GRB781		C:C	China	SW
541	NY1(2366*D9R)XR		C:C	China	SW
542	ZY18*09zheyin		C:C	China	SW
543	Q2(40*21)XR2263		C:C	China	SW
544	XR1-GRB787		C:C	China	SW
545	XR-GRB788		C:C	China	SW
546	L6101		C:C	China	SW
547	OguRf-14L6132		C:C	China	SW
548	Dianyou 23 hao		C:C	China	SW
549	Huayou-5H		C:C	China	SW
550	Luoyou-1H		C:C	China	SW
551	Yangguang198		C:C	China	SW
552	Yuhongyou-1H		C:C	China	SW
553	Yuhongyou-2H		C:C	China	SW
554	Yunyouza 8 hao		C:C	China	SW
555	YuanhuayouZ-1H		C:C	China	SW
556	Xiangyou-17		C:C	China	SW
557	Xi-nan-302		C:C	China	SW
558	K210		C:C	China	SW
559	Xiangyou-13		C:C	China	SW
560	Zhongshuang-821		C:C	China	SW
561	Yang6026		C:C	China	SW
562	Zheyou-601		C:C	China	SW
563	Guiyan-9H		C:C	China	SW
564	K109		C:C	China	SW
565	K103		C:C	China	SW
566	Zhongyou-49		C:C	China	SW
567	Tezao-13		C:C	China	SW
568	Yayou 1 hao		C:C	China	SW
569	ZhY119		C:C	China	SW
570	BA6		C:C	China	SW
571	Robel		C:C	Unknown	SW
572	Q3		C:C	China	W
573	Huangshaung 1 hao		C:C	China	SW
574	Dan		C:C	Denmark	W
575	Hua019		C:C	China	S
576	11H-B32ZCJ		C:C	China	SW
577	11H-B39RHH		C:C	China	SW
578	11H-B26Z		C:C	China	SW
579	11H-B25DGDLZH		C:C	China	SW
580	11H-H151-2		C:C	China	SW
581	Zhyou-28		C:C	China	SW
582	Guiyou-7H		C:C	China	SW
583	GRB1018-827B		C:C	China	SW
584	Darmor		C:C	France	W
585	H1066		C:C	China	SW
586	Rocabo		C:C	Unknown
587	GRB0479		C:C	China	SW
588	Liraglu		C:C	Australia	W
589	Optima		C:C	Denmark	S
590	Enshi31048		C:C	China	SW
591	Nabo		C:C	France	W
592	HJa82470		C:C	Finland	S
593	Koolzaad-2		C:C	Netherlands	W
594	Ramon-1		C:C	Netherlands	W
595	Huayou-2H		C:C	China	SW
596	Canadian Rapeseed No 2		C:C	Canada	S
597	TRIVMPH		C:C	Canada	S
598	P11		C:C	Czech	W
599	Halleyuche		C:C	Korea	S
600	Dong-Hae23		C:C	Japan	W
601	Qinseng		C:C	Japan	W
602	BF10(A)		C:C	China	S
603	P4		C:C	Germany	W
604	Expander		C:C	Germany	W
605	Superlati-velot 601		C:C	New Zealand	W
606	Darmor*Yunnanbaijie-GRB999		C:C	China	SW
607	XR*(XR*2263)-1415-6316		C:C	China	SW
608	XR*2263-1415-6344		C:C	China	SW
609	2263*D9R*XR-1415-94/95		C:C	China	SW
610	(LB*2822(2812*2216))*57R-1415-6358		C:C	China	SW
611	XR*(Q2*1047*17R)-1415-141		C:C	China	SW
612	D1415-RB		C:C	China	SW
613	D1415-H0JS		C:C	China	SW
614	YNDZN-WJQ		C:C	China	SW
615	YY9R		C:C	China	SW
616	YY10B(827B)		C:C	China	SW
617	YY10R		C:C	China	SW
618	LB*2822(2812*2216)		C:C	China	SW
619	D*Baijie-GRB0836		C:C	China	SW
620	D*Baijie-GRB0839		C:C	China	SW
621	D*Baijie-GRB0919		C:C	China	SW
622	D*Baijie-GRB0962		C:C	China	SW
623	D*Baijie-GRB0971		C:C	China	SW
624	D*Baijie-GRB0999		C:C	China	SW
625	1758R		C:C	China	SW
626	XR x 57R		C:C	China	SW
627	2366*D9R*XR*XR		C:C	China	SW
628	1716R		C:C	China	SW
629	westar		C:C	Canada	S

## Sheet: Table S2
Table S2. The primers were used in this study.
Primer names	F: Sequence(5'-3')	R: Sequence(5'-3')	Purpose
yvl-256	CCTGAGGGGTATGTTTATGA	AAAAAGGAAAGGAAAGCAAT	Fine mapping InDel marker
InDel-5	CCTCCAAACCAAGAACATAG	GAATTGACCTGTGCTGAGAT	Fine mapping InDel marker
InDel-9	AATAGCAAAATTTGTGGTCAA	TGTCATGAAAATAACCTTGCT	Fine mapping InDel marker
InDel-O6	TGATCTCTGGAGGGAACAAG	CACCTGCCGATTCATAGAAG	Fine mapping InDel marker
yvl-163	CACTAGCAATCACCACACCA	CCAAAGGCTCTACCTTTCCT	amplified fragment containing SNP variation point
yvl-163-seq	CACTAGCAATCACCACACCA		sequencing primer for verification SNP variation point
yvl-16	AATCCGTGTCAAAACAATGG	TTGTTGCCTTTTATGGTCAAA	amplified fragment containing SNP variation point
yvl-16-seq	AATCCGTGTCAAAACAATGG		sequencing primer for verification SNP variation point
yvl-19	AGGAGTGCATATCTGGTAGGG	TGGCAGAGAAAACATGATGG	amplified fragment containing SNP variation point
yvl-19-seq	AGGAGTGCATATCTGGTAGGG		sequencing primer for verification SNP variation point
yvl-O5	ATGTGGCAAAAAGGTGTCAT	ACATGTGTGATTCCAAGCTCT	amplified fragment containing SNP variation point
yvl-O5-seq	GGTTTGCTCAAGAAAGCT		sequencing primer for verification SNP variation point
yvl-O10	CAACGAAACAAAGCCTGAGT	CTGGTGGTAGCATCATCACA	amplified fragment containing SNP variation point
yvl-O10-seq	TCTTCAGCTTCCCATTCT		sequencing primer for verification SNP variation point
yvl-3	CGATTTAGCGTTGCAATTTT	CTGTGATATCGCTGATCTTG	amplified fragment containing SNP variation point
yvl-3-seq	CGATTTAGCGTTGCAATTTT		sequencing primer for verification SNP variation point
Primer_AlleleFAM	AACCCGAGGCGAATACGCATC		KASP primers for SNP marker yvl-3
Primer_AlleleHEX	CAACCCGAGGCGAATACGCATT
Primer_Common		CTTCTCTGTCAACCAACTGTTGTATCTAT
yvl-8	TCAGCATCTCTCGTGATGAA	ATGTACTTGAGCCGCAAATC	amplified fragment containing SNP variation point
yvl-8-seq	CAACACTGTGGGATGGAGT		sequencing primer for verification SNP variation point
Primer_AlleleFAM	GAAGCTCAAGGACTTGTACTCCC		KASP primers for SNP marker yvl-8
Primer_AlleleHEX	AGAAGCTCAAGGACTTGTACTCCT
Primer_Common		CGATCGATCCCTTCAATCTTGTCTTCA
ORF1-TY	accatgattacgccaagcttCTGCAATAACGAACAACACAA	gactgaccacccggggatccAACCCTTTCCAACAGGTCTC	gene-specifc primers for cloning ORF1
ORF2-TY	accatgattacgccaagcttTTACCAAAAGGAAGCGATGG	gactgaccacccggggatccTGGTTTTGGATTGCGTTACA	gene-specifc primers for cloning ORF2
ORF3-TY	accatgattacgccaagcttCGGGAGCCCATAACTATCAA	gactgaccacccggggatccAAAGCAGTGGCTCAGGTGTT	gene-specifc primers for cloning ORF3
ORF4-TY	accatgattacgccaagcttTCAACATTGTTCGTCGCTTA	gactgaccacccggggatccATTGTCAACCATCGCATTTT	gene-specifc primers for cloning ORF4
ORF5-TY	accatgattacgccaagcttTTTCGAGCATTAATCATAATATCC	gactgaccacccggggatccAATTTGAAAACCAGCGTCAG	gene-specifc primers for cloning ORF5
ORF6-TY	accatgattacgccaagcttTGCCATTTCTGGCAGTTTAT	gactgaccacccggggatccAACCATTCAGAAGGCTTGTT	gene-specifc primers for cloning ORF6
ORF7-TY	accatgattacgccaagcttTCACGCATCGGTAAAGAATG	gactgaccacccggggatccTCTTAAGCCCTTGTGCCAAC	gene-specifc primers for cloning ORF7
ORF8-TY	accatgattacgccaagcttAATGTTGCATCCAATCGTCT	gactgaccacccggggatccTAATGGTCCTCCCCACAATA	gene-specifc primers for cloning ORF8
ORF9-TY	accatgattacgccaagcttCTCCCAAGTTTAGGTCAGCA	gactgaccacccggggatccTGAGGGAATTTGGGGATATT	gene-specifc primers for cloning ORF9
ORF10-TY	accatgattacgccaagcttCAACAACCACACACTCACTCG	gactgaccacccggggatccCTGGTGAAGTAGGCATGCAA	gene-specifc primers for cloning ORF10
ORF11-TY	accatgattacgccaagcttAAGTGGTGGGAAGGAAGAAC	gactgaccacccggggatccAGCTTCCACCAAAATCTGTG	gene-specifc primers for cloning ORF11
ORF12-TY	accatgattacgccaagcttATCATGGCAACTAGCTCGAC	gactgaccacccggggatccGCTGTTTCAAGGCATCTGTT	gene-specifc primers for cloning ORF12
ORF13-TY	accatgattacgccaagcttTGCCGTTTTCGATTCTATTC	gactgaccacccggggatccTTCATGCAACACGTGAAATC	gene-specifc primers for cloning ORF13
ORF14-TY	accatgattacgccaagcttAGAGAACGTGACGATTTTGG	gactgaccacccggggatccGCAGAACCATGACAATGAAA	gene-specifc primers for cloning ORF14
	GATATTTTGTGGATCCGGTTAC	CCACAAGATAAGGAACATCAAG	qPCR analysis of BnaA03.CHLH expression
	CTGGAATTGCTGACCGTATGAG	ATCTGTTGGAAAGTGCTGAGGG	qPCR primer of BnaACTIN

## Sheet: Table S3
Table S3. Comparison of agronomic traits between ZS9 and yvl mutanta
Agronomic traits	ZS9	yvl
Plant height (cm)	164.04±9.00	153.55±8.90
Branch initiation height (cm)	70.04±15.03	60.59±12.72
Main inflorescence length (cm)	48.82±5.89	46.96±8.71
Silique number of main inflorescence	62.65±13.54	62.48±11.30
Primary branch number	7.82±1.61	7.66±1.68
1000-seed weight (g)	3.13±0.16	3.10±0.20
a Statistical analysis of agronomic traits between ZS9 and yvl plants. Thirty plants were measured. Error bars indicate SD; **P < 0.01(Student’st-test).

## Sheet: Table S4
Table S4. Chlorophyll contents of younger and older leaves between ZS9 and yvla
Sample	Chl a	Chl b	Car	Total Chl	Chl a/b ratio
ZS9-YL	1.10±0.04	0.24±0.01	0.31±0.009	1.35±0.05	4.57±0.19
yvl-YL	0.28±0.06**	0.03±0.007**	0.15±0.01**	0.32±0.06**	8.63±0.70
ZS9-OL	1.01±0.06	0.20±0.02	0.23±0.02	1.21±0.08	5.06±0.14
yvl-OL	0.54±0.10**	0.06±0.01**	0.15±0.06*	0.60±0.12**	9.52±0.62
a Chl a, Chl b and Car were measured in acetone extracts from younger and older leaves at the eight leaves-staged after sowing. Data are shown as means ± SD from three independent replicates *P< 0.05 and **P< 0.01(Student’s t-test)

## Sheet: Table S5
Table S5. The statistics of comparison between sequencing reads and reference genome
Sample	Number of bulked plants	Mapped readsa	Total readsb	Mapping rate (%)c	Average depth (×)d	Genome coverage (%)e
G (ZS9)	-	130105823	133733072	97.29	19.84	91.43
Y (yvl)	-	132975368	135101702	98.43	23.49	92.73
G-pool	30	183266056	186341404	98.35	30.43	95.99
Y-pool	30	175437336	178493196	98.29	26.96	94.34
a The Number of sequencing reads mapped on reference b The total number of reads for valid sequencing data c Divide the number of reads on the reference genome by the number of reads on the valid sequencing data d Divide the total number of bases compared to the reference genome by the genome size e In the reference genome, at least one base-covered site accounts for the percentage of the genome.

## Sheet: Table S6
Table S6. The detail and functional annotation of 14 ORFs
ORFs	B. napus Gene ID	Arabidopsis ID	Start	End	Sense or antisense	Annotation
ORF1	BnaA03g04350D	AT5G13460.1	2034240	2036929	+	IQ-domain 11
ORF2	BnaA03g04360D	AT5G13480.1	2036980	2041705	-	WD40 repeat-like superfamily protein
ORF3	BnaA03g04370D	AT5G13490.2	2042951	2045084	+	Encodes mitochondrial ADP/ATP carrier
ORF4	BnaA03g04380D	AT5G13500.3	2045472	2048701	+	Function unknown
ORF5	BnaA03g04390D	AT5G13530.1	2049790	2054408	+	a RING E3 ligase involved in abscisic acid signaling
ORF6	BnaA03g04400D	AT5G13530.1	2054641	2057580	+	a RING E3 ligase involved in abscisic acid signaling
ORF7	BnaA03g04410D	AT5G13550.1	2057629	2061647	-	Encodes a sulfate transporter.
ORF8	BnaA03g04420D		2069440	2070925	-	Function unknown
ORF9	BnaA03g04430D	AT3G55620.1	2072540	2073724	+	Translation initiation factor IF6
ORF10	BnaA03g04440D	AT5G13630.1	2074644	2080271	-	putative magnesium-chelatase subunit CHLH
ORF11	BnaA03g04450D	AT5G13660.1	2082699	2084340	+	Function unknown
ORF12	BnaA03g04460D	AT5G13700.1	2085310	2088389	-	Encodes a protein with polyamine oxidase activity
ORF13	BnaA03g04470D	AT5G13740.1	2094214	2097558	+	Encodes ZIF1 (ZINC-INDUCED FACILITATOR1)
ORF14	BnaA03g04480D	AT5G13750.1	2098813	2101709	+	zinc induced facilitator-like 1

## Sheet: Sheet6
Table S7. The functional annotation of genes transcribed by PEP and NEP.
Type	Gene name	Annotation
Class I	psaA	photosystem I reaction center protein A
	psbA	photosystem II reaction center protein A
	psbH	photosystem II reaction center protein H
	rbcL	large subunit of RUBISCO
	petB	photosynthetic electron transfer B
	ndhA	NADH dehydrogenase family protein
Class II	atpI	ATPase, F0 complex, subunit A protein
	rps16	ribosomal protein S16
	clpP	ATP-dependent caseinolytic (Clp) protease/crotonase family protein
	ycf1	Nucleic acid-binding proteins superfamily
Class III	accD	acetyl-CoA carboxylase carboxyl transferase subunit beta
	rpoB	RNA polymerase subunit beta
	rpoA	RNA polymerase subunit alpha
	rpoC1	RNA polymerase beta' subunit-1
	rpoC2	RNA polymerase beta' subunit-2
	ycf2	Chloroplast Ycf2; ATPase, AAA type, core
